# Supplementary material
Source: Springer Nature journal article supplement (https://www.springermedizin.de/resource/supplementary/13058_2011_2956_MOESM2_ESM.pdf/9702856)

**A.**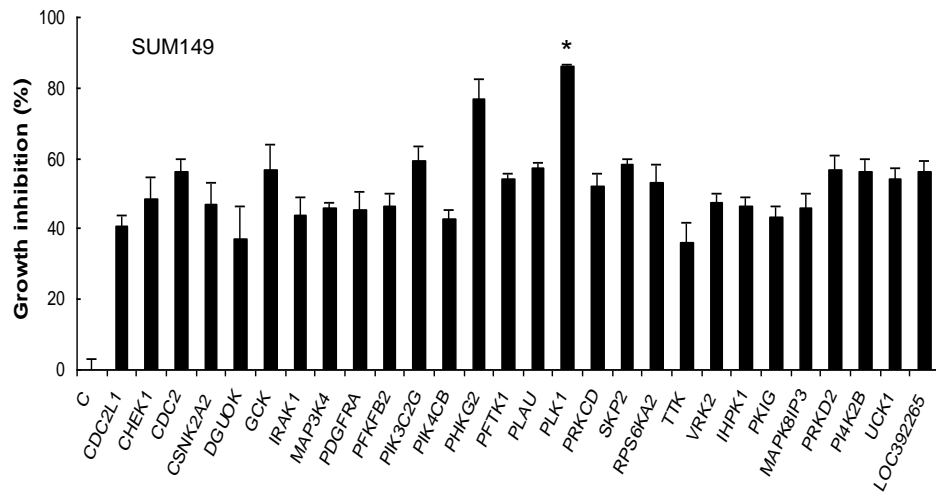**C.**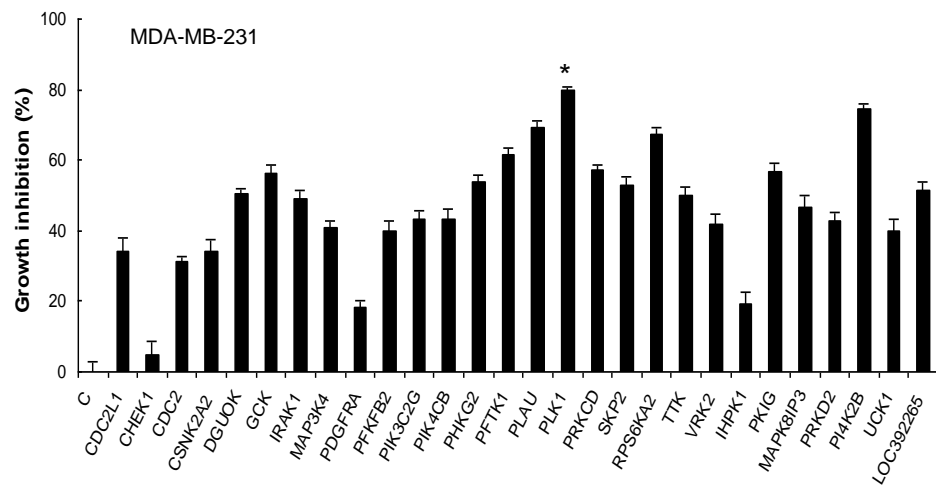**B.**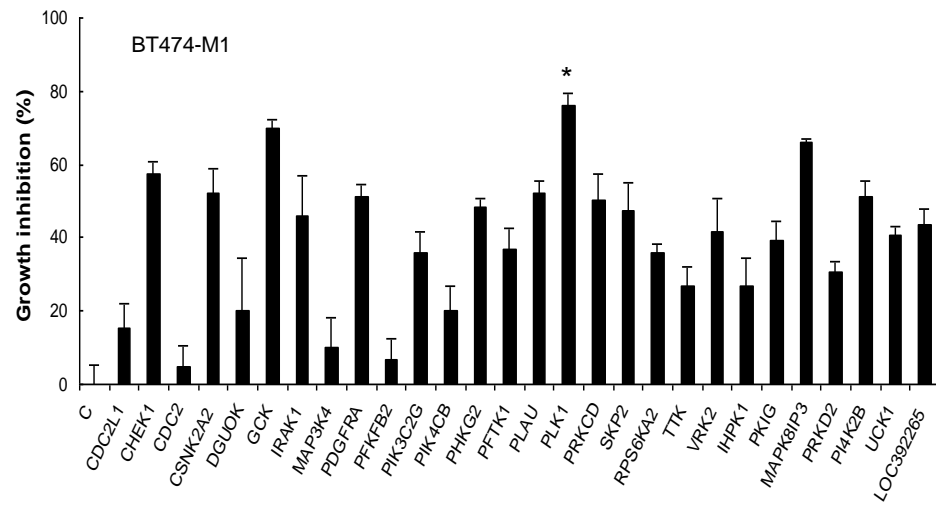**D.**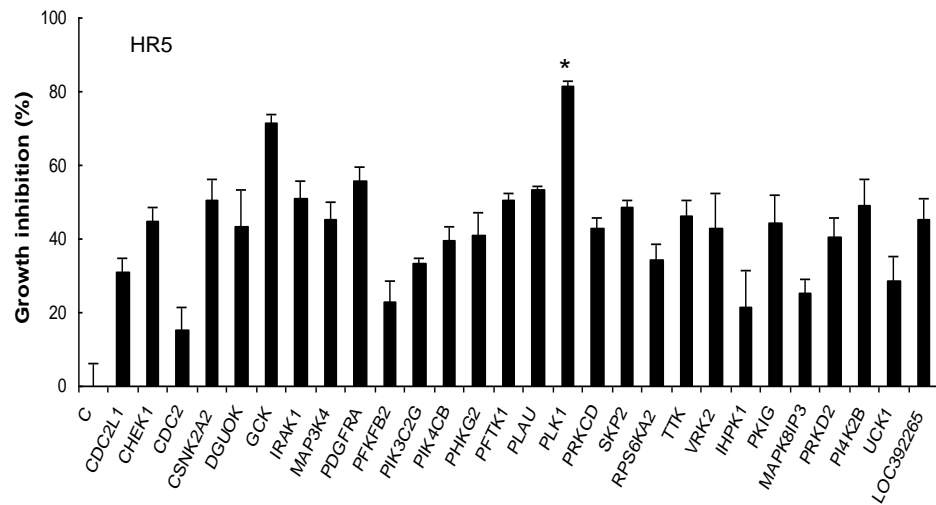

Supplement: MOESM2 [file 9702856]
